# Supplementary material for: Banana Peel Powder Biosorbent for Removal of Hazardous Organic Pollutants from Wastewater
Source: MDPI journal article supplement (doi:10.3390/toxics11080664), 2023-08-01
Supplement: s1 [file s1]

# **Supplementary material**

## **Banana peel powder biosorbent for removal of hazardous organic pollutants from wastewater**

Kelly C. S. Farias<sup>a</sup>, Rita C. A. Guimarães <sup>b</sup>, Karla R. W. Oliveira<sup>c</sup>, Carlos E. D. Nazário<sup>c</sup>, Julio A. P. Ferencz<sup>a,d</sup> and Heberton Wender<sup>a\*</sup>

<sup>a</sup>Nano&Photon Research Group, Laboratory of Nanomaterials and Applied Nanotechnology (LNNA), Institute of Physics, Federal University of Mato Grosso do Sul, Campo Grande, Mato Grosso do Sul, 79070-900, Brazil

<sup>b</sup>Graduate Program in Health and Development in the Midwest Region, Medical School, Federal University of Mato Grosso do Sul, Campo Grande 79070-900, Brazil

<sup>c</sup>Institute of Chemistry, Federal University of Mato Grosso do Sul, 79070-900, Campo Grande, MS, Brazil

<sup>d</sup>Faculty of Engineering, Architecture and Urbanism and Geography, Federal University of Mato Grosso do Sul, 79070-900, Campo Grande, MS, Brazil.

\*Corresponding authors: [heberton.wender@ufms.br](mailto:heberton.wender@ufms.br)

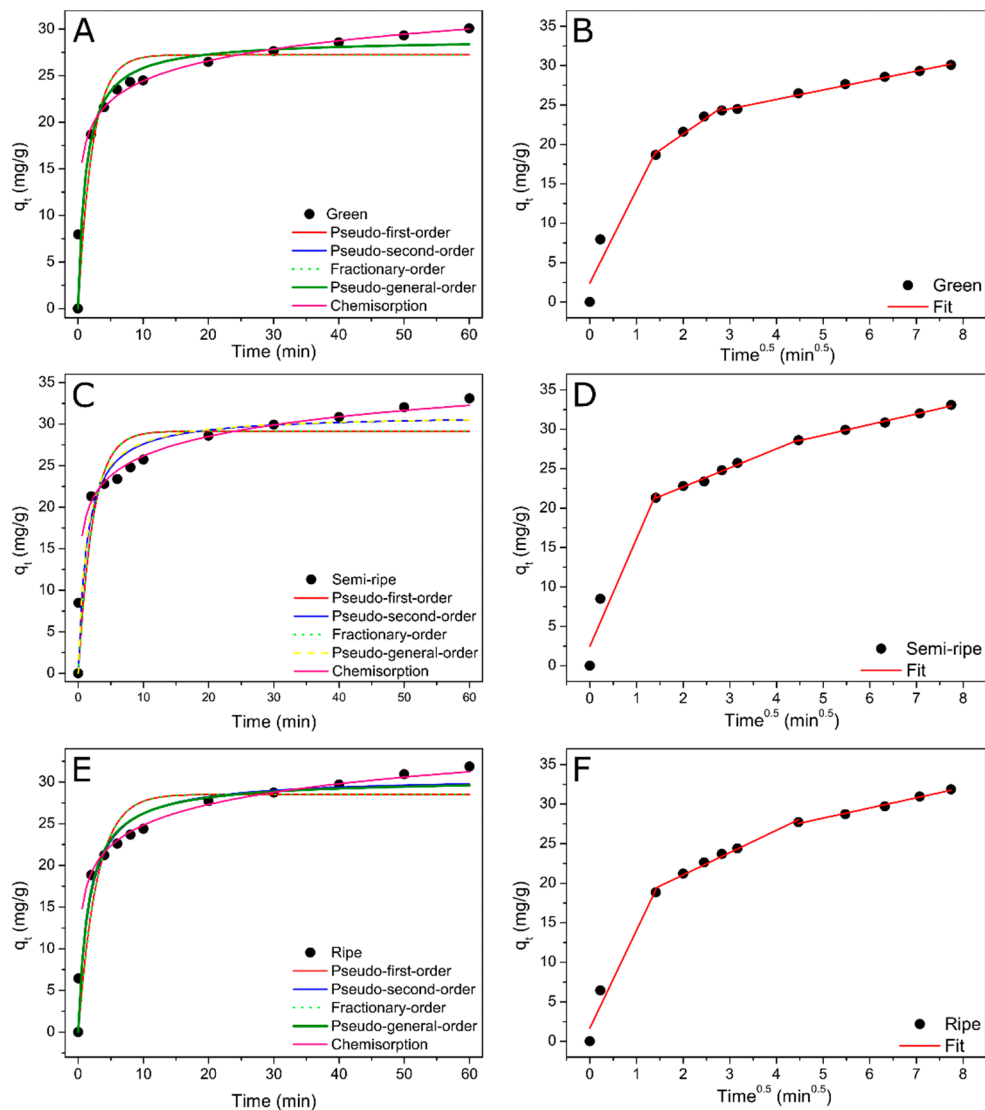

Figure S1. Kinetic models and intraparticle diffusion fits for MB removal using green (A, B), semi-ripe (C, D), and ripe (E, F) BPP. Conditions: 50 mg of BPP (biosorbent) and 50 mL MB dye solution at  $C_0 = 50 \text{ mg L}^{-1}$ .

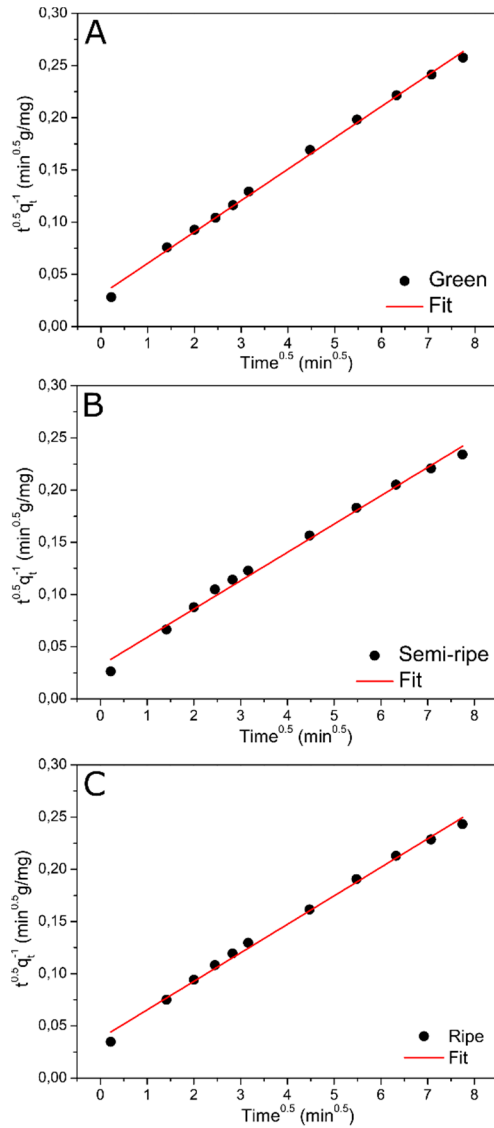

Figure S2. Fitted curves of the diffusion-chemisorption model for green (A), semi-ripe (B), and ripe (C) BPP. Conditions: 50 mg of BPP (biosorbent) and 50 mL MB dye solution at  $C_0 = 50 \text{ mg L}^{-1}$ .

Table S1. Parameters obtained from the diffusion-chemisorption model for MB removal using green, semi-ripe, and ripe banana peel flour as biosorbent.

| Parameters                                   | Ripeness stage       |                      |                      |
|----------------------------------------------|----------------------|----------------------|----------------------|
|                                              | Green                | Semi-ripe            | Ripe                 |
| <b>Diffusion-chemisorption</b>               |                      |                      |                      |
| $k_{DC}(\text{mg g}^{-1} \text{min}^{-0.5})$ | $32.76 \pm 2.78$     | $31.40 \pm 3.58$     | $26.25 \pm 1.98$     |
| $q_e(\text{mg g}^{-1})$                      | $33.26 \pm 0.63$     | $36.85 \pm 1.08$     | $36.61 \pm 0.84$     |
| $R_{adj}^2$                                  | 0.9965               | 0.9916               | 0.9948               |
| Residual sum of squares                      | $1.92 \cdot 10^{-5}$ | $3.79 \cdot 10^{-5}$ | $2.37 \cdot 10^{-5}$ |

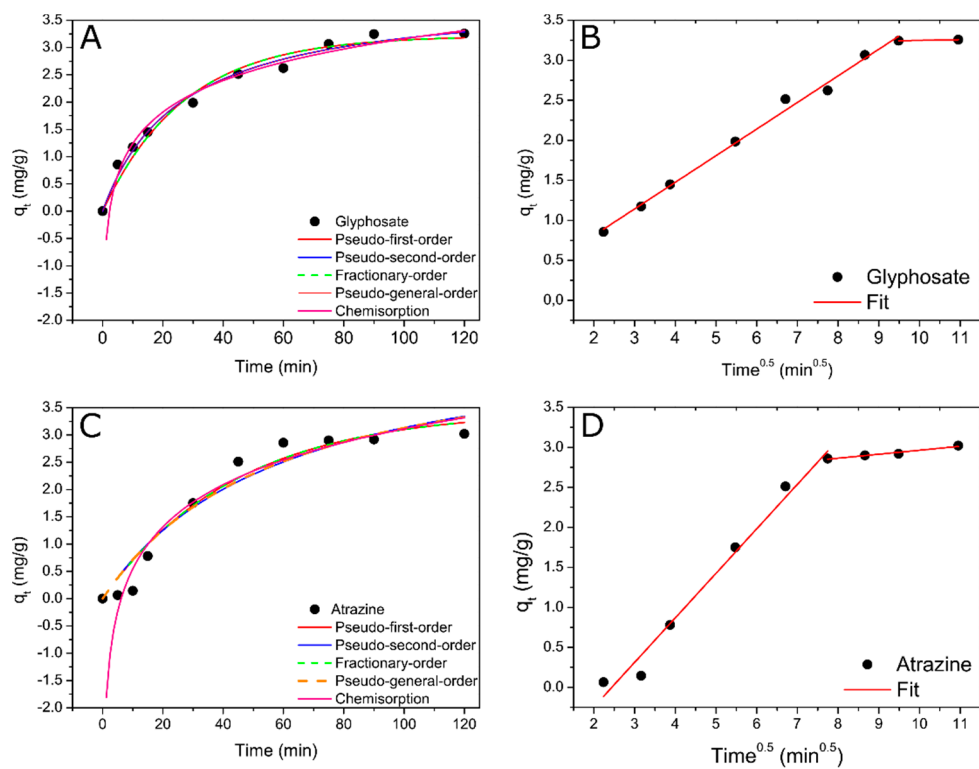

Figure S3. Fitted curves of the different kinetic models studied for semi-ripe BPP using glyphosate (A) and atrazine (C) as a pollutant and the intraparticle diffusion fit for glyphosate (B) and atrazine (D). Conditions: 60 mg of semi-ripe BPP and 10 mL of the pesticide at  $C_0 = 20 \text{ mg L}^{-1}$ .
